# Supplementary material
Source: PubMed Central journal article supplement (PMC8902703)
Supplement: NIHMS1569257-supplement-Supp_Fig_1-_9.pdf [file NIHMS1569257-supplement-Supp_Fig_1-_9.pdf]

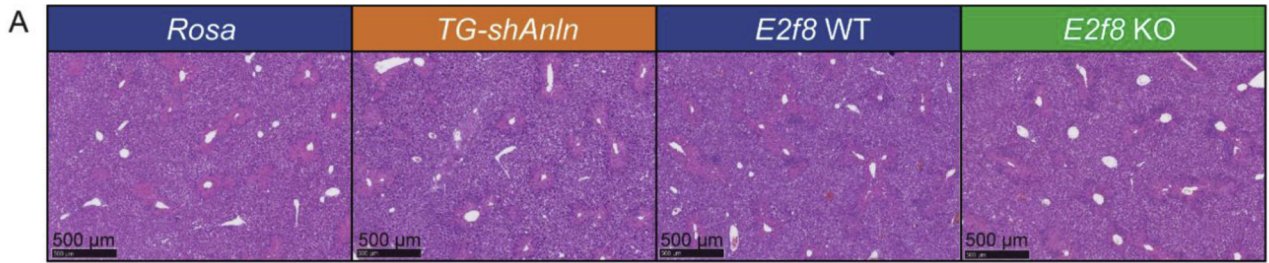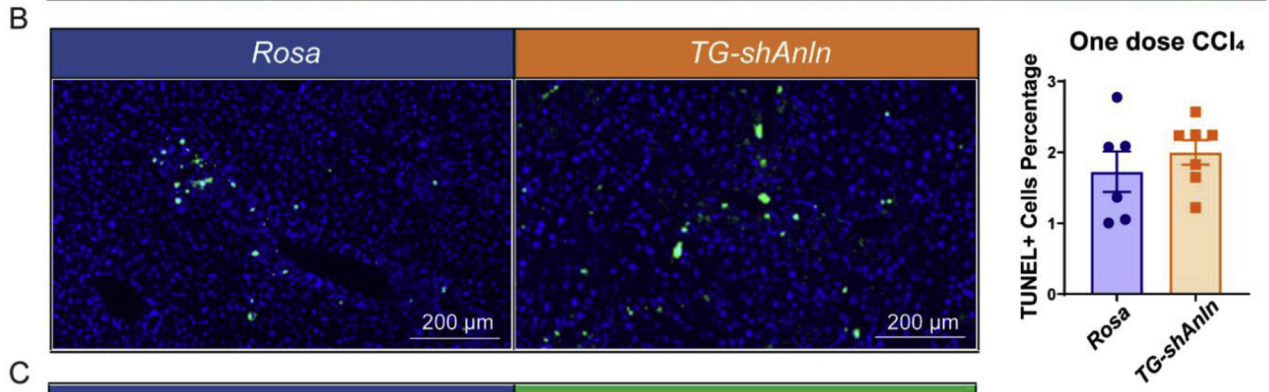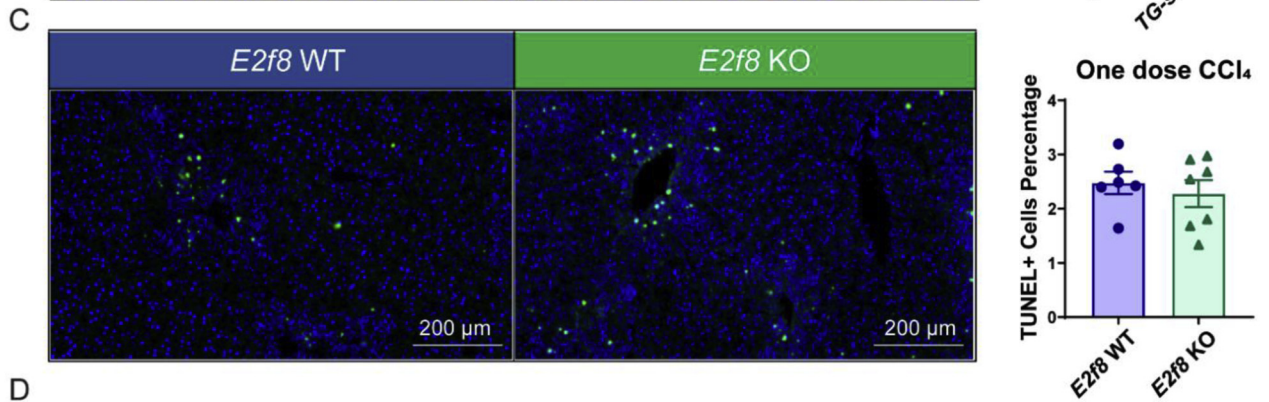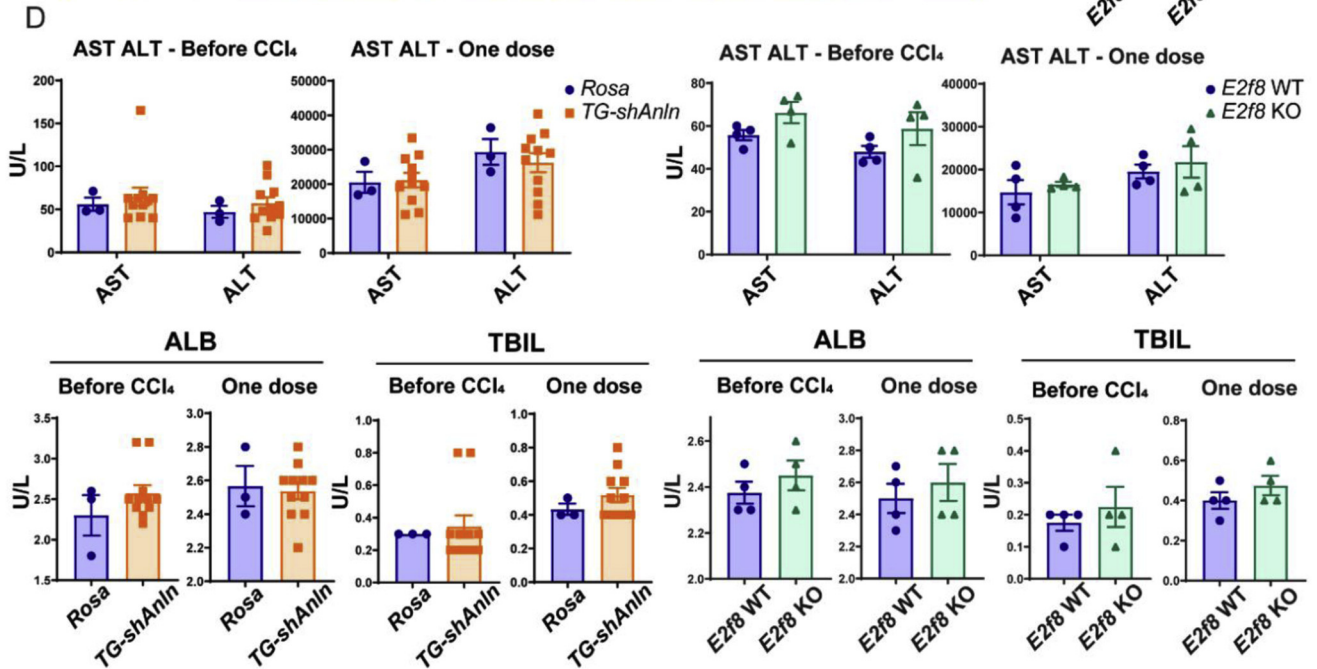

---

**Supplementary Figure 5.** Polyploidy does not have a differential impact after 1 dose of CCl<sub>4</sub>. Related to [Figure 3](#). (A) Hematoxylin-eosin staining of *Rosa*, *TG-shAnln*, *E2f8* WT, and KO livers 48 hours after 1 dose of CCl<sub>4</sub>. (B) Apoptosis in *Rosa* and *TG-shAnln* livers 48 hours after 1 dose of CCl<sub>4</sub> as measured by terminal deoxynucleotidyl transferase-mediated deoxyuridine triphosphate nick-end labeling (TUNEL) staining. The percentage of TUNEL-positive cells was quantified in whole slide images, shown on the right (n = 6 for *Rosa*, n=7 for *TG-shAnln*). (C) Apoptosis of *E2f8* WT and KO livers 48 hours after 1 dose of CCl<sub>4</sub> as measured by TUNEL staining. The percentage of TUNEL-positive cells was quantified in whole slide images, shown on the right (n = 6 for *E2f8* WT, n = 7 for *E2f8* KO). (D) Liver function tests performed before and after 1 dose of CCl<sub>4</sub> (n = 3 for *Rosa* and n = 11 for *TG-shAnln*, n = 4 for *E2f8* WT and KO).

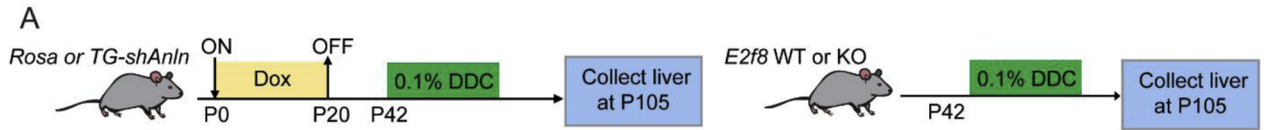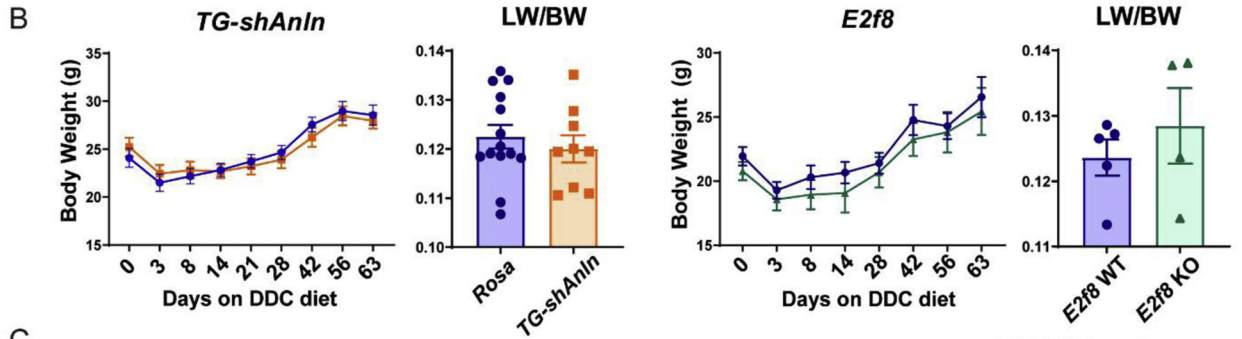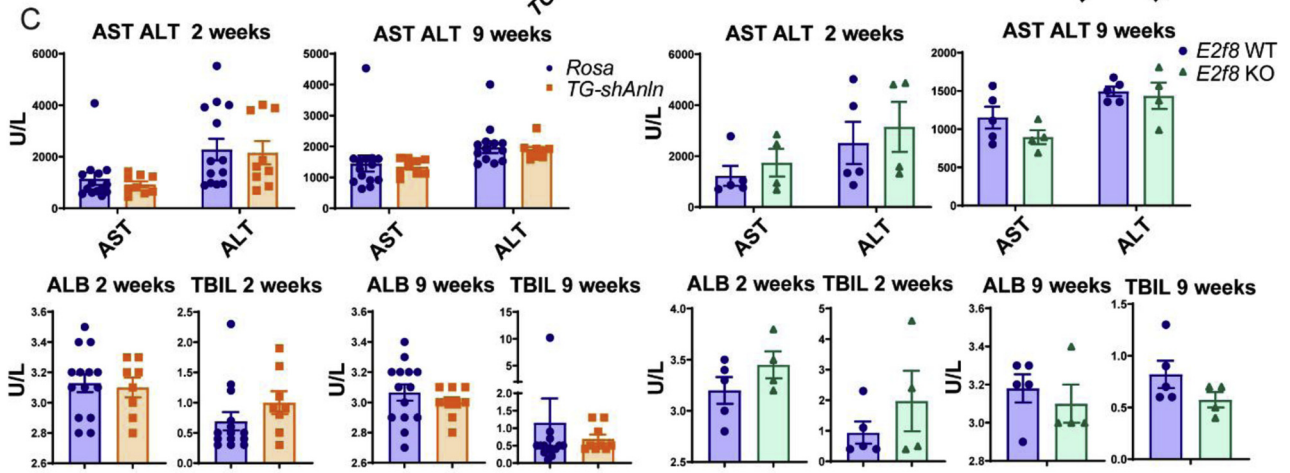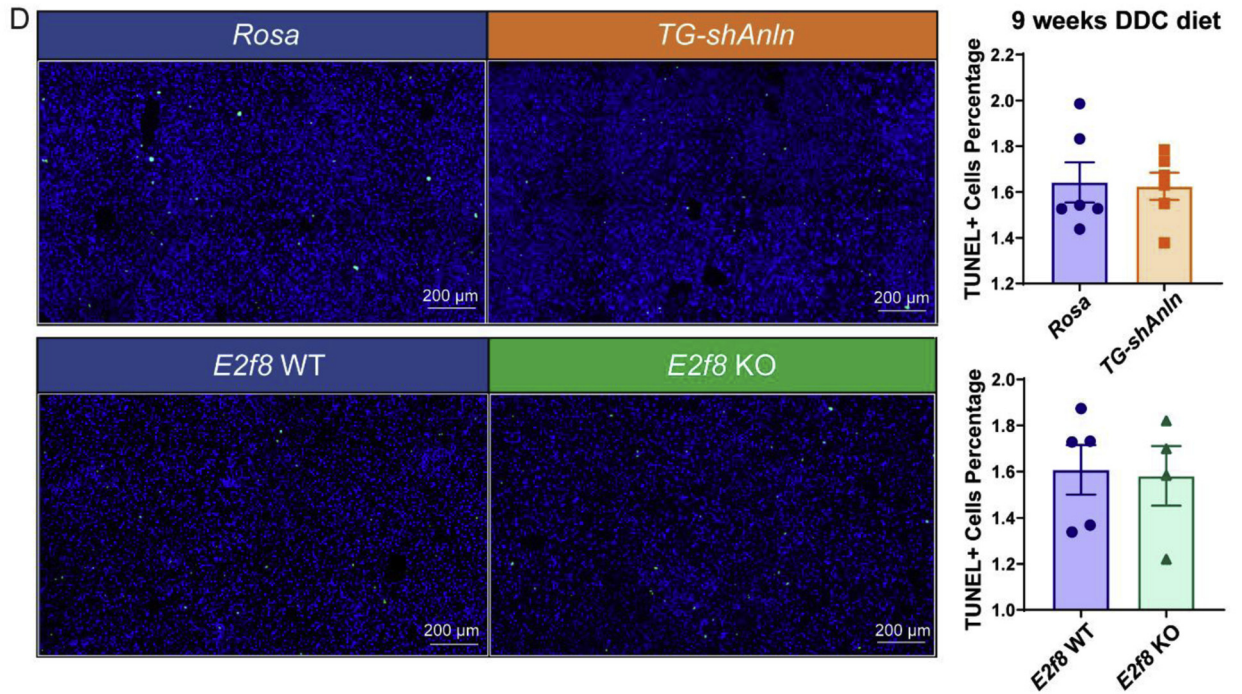

---

**Supplementary Figure 6.** Polyploidy does not influence liver damage mediated by DDC. Related to [Figure 3](#). (A) Schema for the DDC experiment in inducible short hairpin RNA mice (left) and *E2f8* KO mice (right). Transient doxycyclin treatment from P0 to P20 in *Rosa-rtta* or *TG-shAnln* mice established ploidy differences. DDC diet was started at P42. The body weights were monitored and livers were harvested after 9 weeks of the DDC diet. (B) Body weight over a 9-week period and the liver and body weight ratios after 9 weeks of DDC diet (n = 14 for *Rosa*, n = 9 for *TG-shAnln*, n = 5 for *E2f8* WT, and n = 4 for *E2f8* KO). (C) Liver function tests after 2 weeks and 9 weeks of DDC diet (n = 14 for *Rosa*, n = 9 for *TG-shAnln*, n = 5 for *E2f8* WT, and n = 4 for *E2f8* KO). (D) Apoptosis after 9 weeks of DDC as measured by TUNEL staining. The percentage of TUNEL positive cells was quantified in whole slide images, shown on the right (n = 6 for *Rosa* and *TG-shAnln*, n = 5 for *E2f8* WT, and n = 4 for *E2f8* KO).



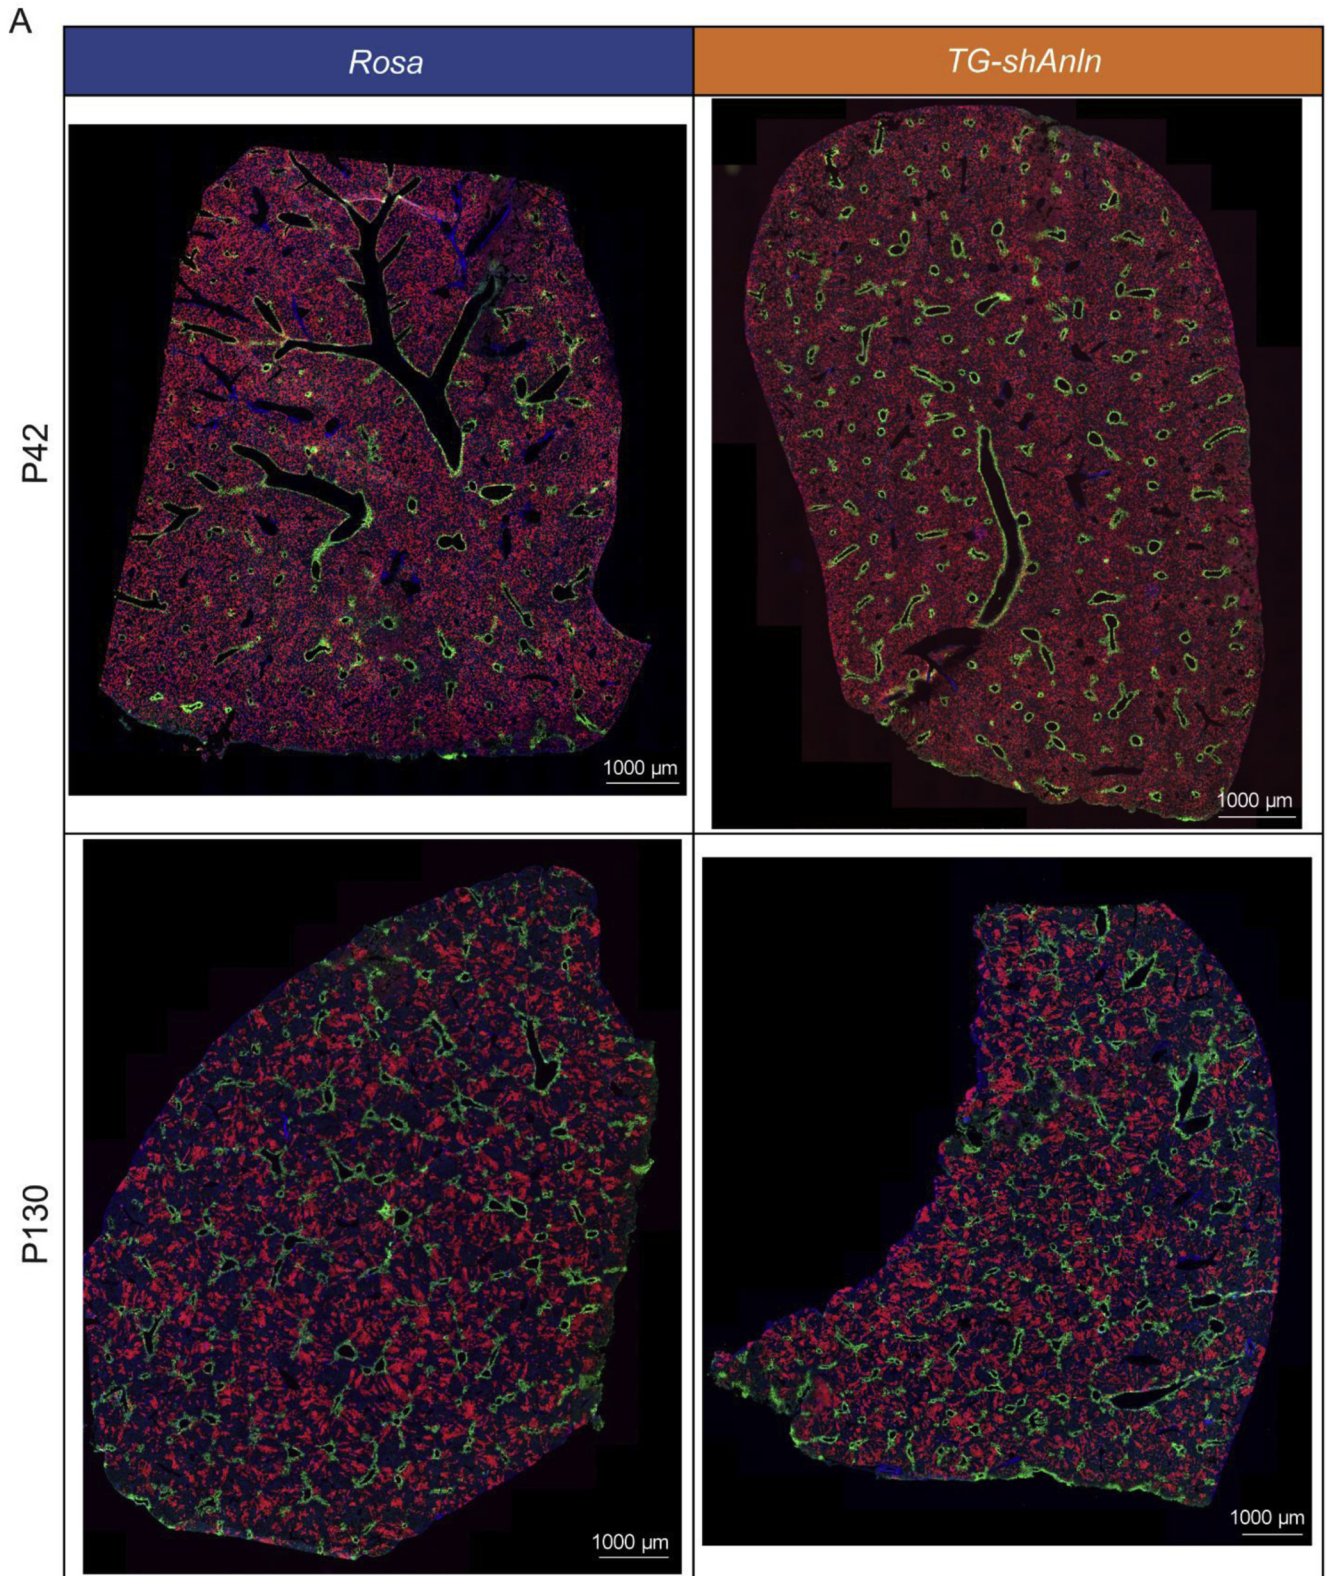

Glutamine synthetase *tdTomato*

**Supplementary Figure 7.** Hepatocytes contribute to liver regeneration during chronic  $\text{CCl}_4$  injury. Related to [Figure 4](#). Representative whole slide images from the *tdTomato* lineage tracing experiment. GS is shown in green and *tdTomato* is shown in red.

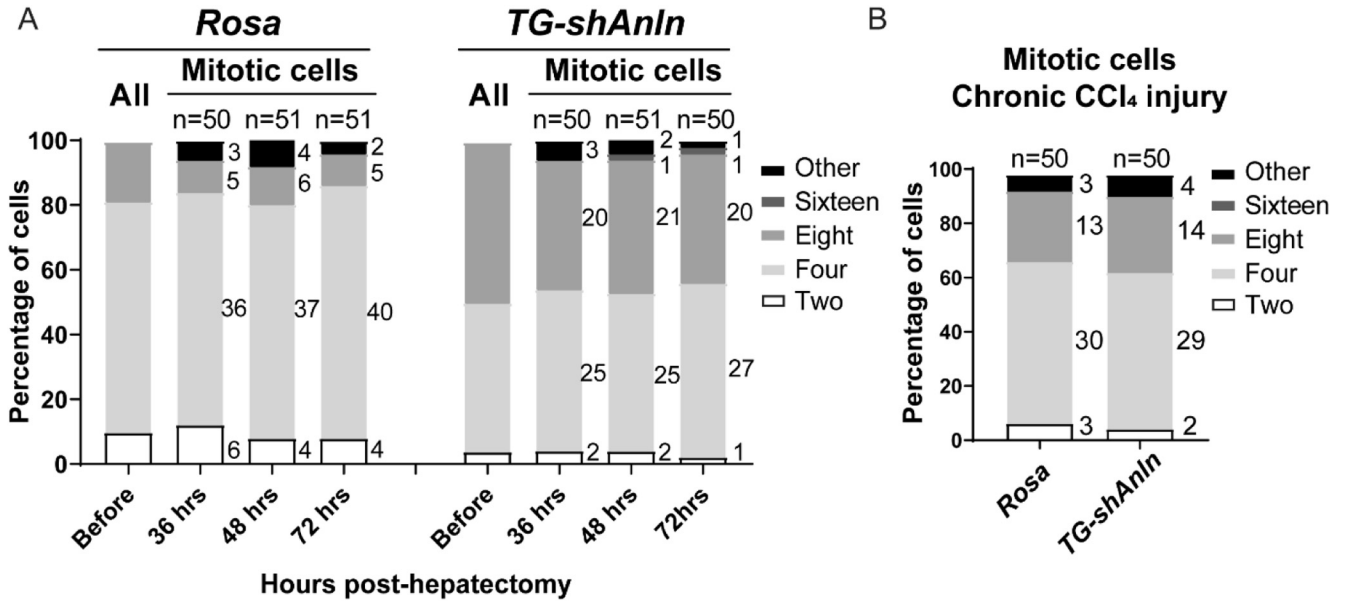

**Supplementary Figure 8.** Polyploid hepatocytes undergo mitosis during different stages of surgical-induced and chronic chemical injury-induced regeneration. Related to [Figure 5](#). (A) Transient doxycycline treatment established ploidy differences. *Rosa* or *TG-shAnln* were subjected to 70% partial hepatectomy, and the livers were collected at different timepoints after hepatectomy. Ploidy distribution before injury is determined by flow. Ploidy of mitotic hepatocytes is estimated by centrosome number (quantified  $\gamma$ -tubulin foci). More than 50 mitotic cells from 2 mice were measured in each condition. (B) *Rosa* or *TG-shAnln* were subjected to biweekly CCl<sub>4</sub> for 12 weeks. Livers were harvested 48 hours after the last dosage of CCl<sub>4</sub>. Ploidy of mitotic hepatocytes is estimated by centrosome number (quantified  $\gamma$ -tubulin foci). Fifty mitotic cells from 4 mice were measured in each group.



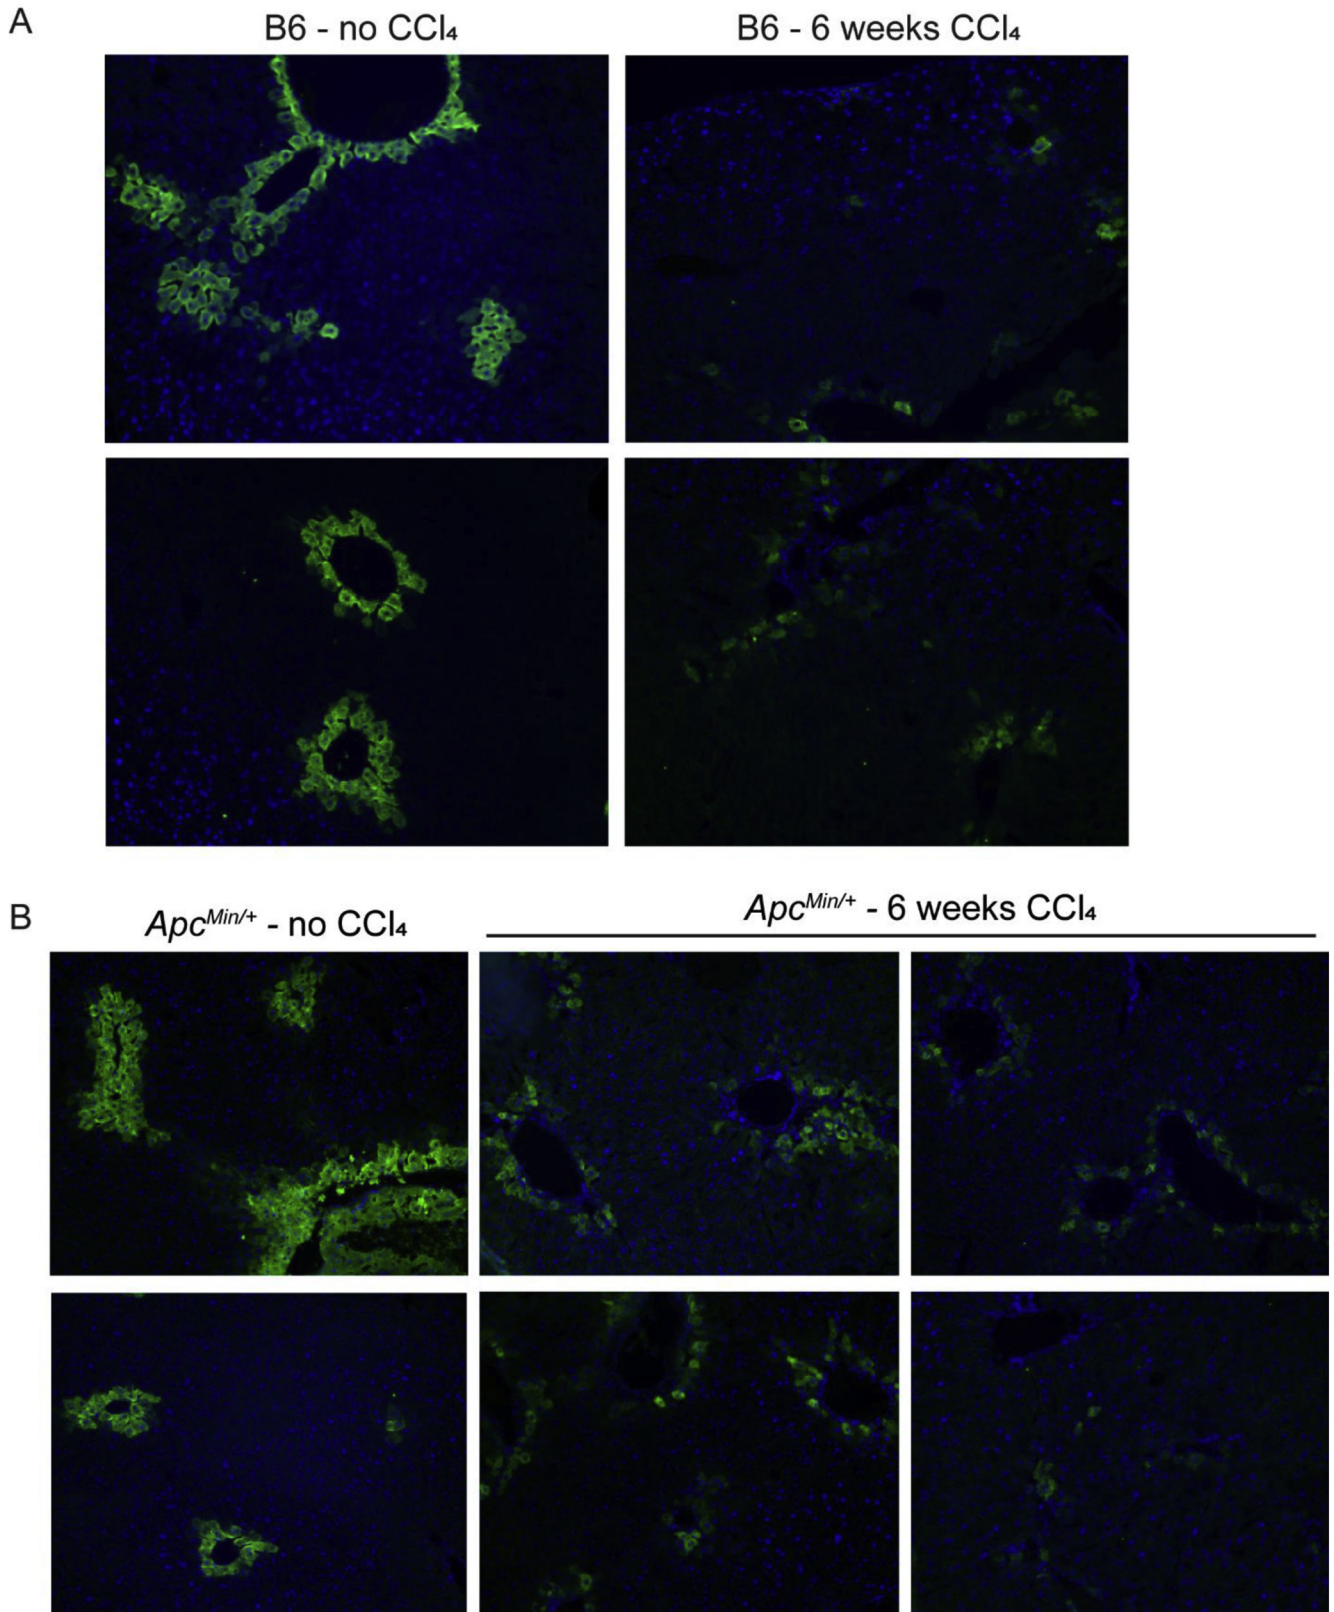

**Supplementary Figure 9.** Chronically injured heterozygous *Apc*<sup>Min</sup> livers do not readily develop *Apc* LOH. Related to [Figure 5](#). (A) GS staining of WT mice without or after 6 weeks of biweekly CCl<sub>4</sub>. (B) GS staining of *Apc*<sup>Min/+</sup> mice without or after 6 weeks of biweekly CCl<sub>4</sub>.
